# Supplementary material
Source: PubMed Central journal article supplement (PMC4457399)
Supplement: NIHMS631919-supplement-Supp_FigureS1-S3.pdf [file NIHMS631919-supplement-Supp_FigureS1-S3.pdf]

## Supplementary figures

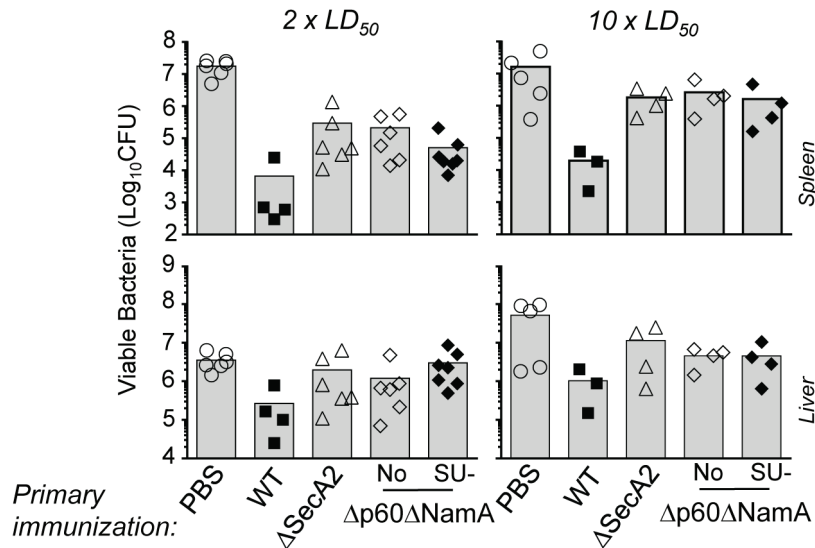

**Figure S1: Mice immunized with *Lm* lacking p60 and NamA autolysins fail to mount protective memory responses upon challenge with 2 or 10 LD<sub>50</sub> of WT *Lm*.** WT BALB/c mice were primary immunized i.v. with 0.1xLD<sub>50</sub> WT (5,000), ΔSecA2 (0.6x10<sup>6</sup>) and two distinct doses of Δp60ΔNamA (0.6x10<sup>7</sup>, 3x10<sup>7</sup>) *Lm*, or injected with PBS (unimmunized control). Five weeks later, mice were challenged with either 2 (6x10<sup>4</sup>) or 10xLD<sub>50</sub> WT *Lm* (3x10<sup>5</sup>), and spleen and liver were harvested 48 hrs later, lysed and plated to determine the number of viable bacterial CFUs. Each symbol represents one individual mouse and shaded bars the average (Mean value). Data are the results from one experiment with each symbol representing one individual mouse.

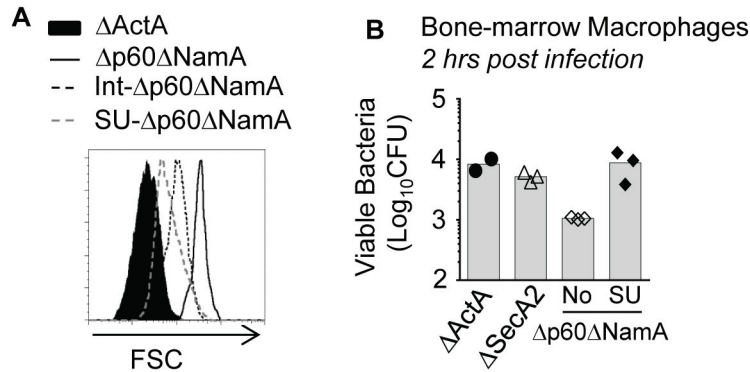

**Figure S2:** (A) Relative sizes (FSC) of indicated GFP<sup>+</sup> *Lm* mutants grown to log phase in BHI medium assessed by FACS. (B) Intracellular bacterial CFU recovered from BMMP infected for 2 hours by the various *Lm* after lysis and plating.

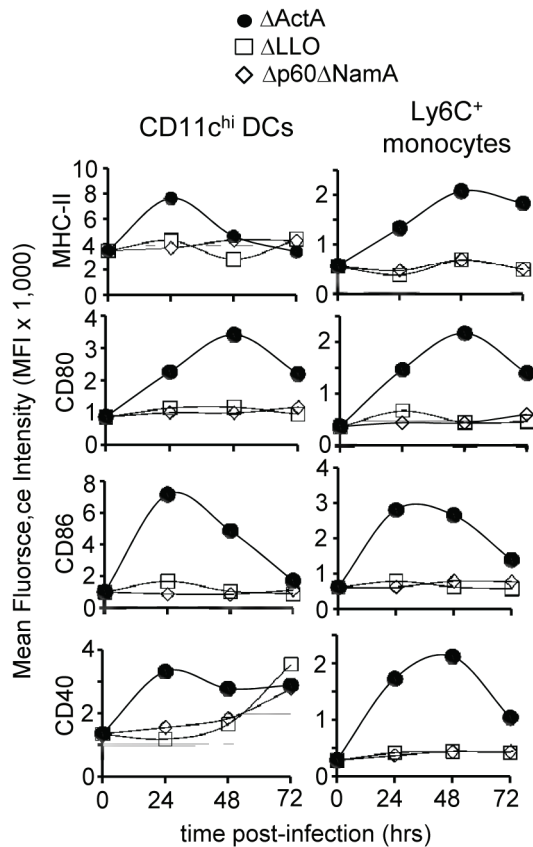

**Figure S3:** Kinetics over 72 hours of MHC class II and indicated costimulatory molecules upregulation at the surface of spleen CD11c<sup>hi</sup> DC and Ly6C<sup>+</sup> monocytes following immunization

of WT B6 mice with 0.1xLD<sub>50</sub> WT, ΔLLO or Δp60ΔNamA *Lm*. Data are representative of 1 of 2 experiments with 2 mice per group and time point.
